# Supplementary material for: Agouti-Signalling Protein Overexpression Reduces Aggressiveness in Zebrafish
Source: MDPI journal article supplement (doi:10.3390/biology12050712), 2023-05-13
Supplement: s1 [file s1]

SUPPLEMENTARY INFORMATION

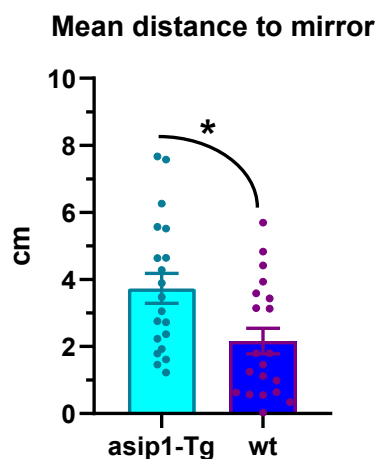

**Figure S1.** Mean distance to mirror of *asip1*-Tg ( $n = 20$ ) and WT ( $n = 20$ ) in the mirror-image stimulus test. Data were represented as mean  $\pm$  SEM and analysed by Unpaired t-test. Asterisks indicate statistical differences between genotypes ( $*p \leq 0.05$ ). Blue and purple colours represent *asip1*-Tg and WT fish, respectively.

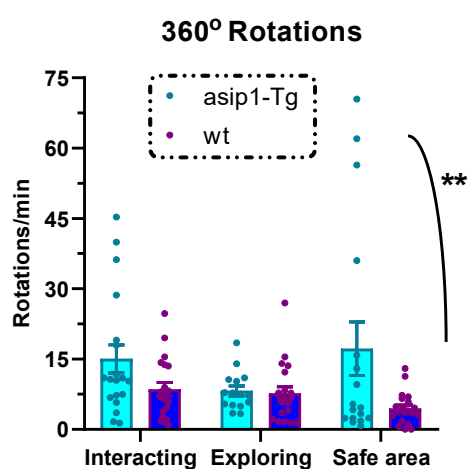

| Two-way ANOVA | P value | Sidak's multiple comparisons test |         |
|---------------|---------|-----------------------------------|---------|
| Interaction   | 0,0868  | asip1-Tg - wt                     | P value |
| Behaviour     | 0,3456  | Interacting                       | 0,2224  |
| Genotype      | 0,0035  | Exploring                         | 0,9991  |
|               |         | Safe area                         | 0,0034  |

**Figure S2.** 360° Rotations per minute in the mirror-image stimulus test. Three arena zones were previously defined i) a safe area, consisting of the bottom part of the tank, ii) an exploration zone close to the mirror and iii) an interaction zone where direct contact of the fish with the mirror can occur. Experiments were performed on 20 WT and 20 *asip1*-Tg fish. Data are represented as mean  $\pm$  SEM and analysed by two-way ANOVA followed by Sidak's multiple comparison test (latency to first). Asterisks indicate statistical differences between genotypes ( $*p \leq 0.05$ ,  $**p \leq 0.01$ ).
